# Supplementary material for: Copper-catalyzed oxidative esterification of aldehydes with dialkyl peroxides: efficient synthesis of esters of tertiary alcohols
Source: Royal Society of Chemistry journal article supplement (doi:10.1039/c3ra40246k), 2013-01-01
Supplement: c3ra40246k.pdf [file c3ra40246k.pdf]

## Supporting Information

### Copper-Catalyzed Oxidative Esterification of Aldehydes with Dialkyl

### Peroxides: Efficient Synthesis of Esters of Tertiary Alcohols

Yefeng Zhu and Yunyang Wei\*

School of Chemical Engineering, Nanjing University of Science and Technology,  
Nanjing 210094, China; E-mail: [ywei@mail.njust.edu.cn](mailto:ywei@mail.njust.edu.cn)

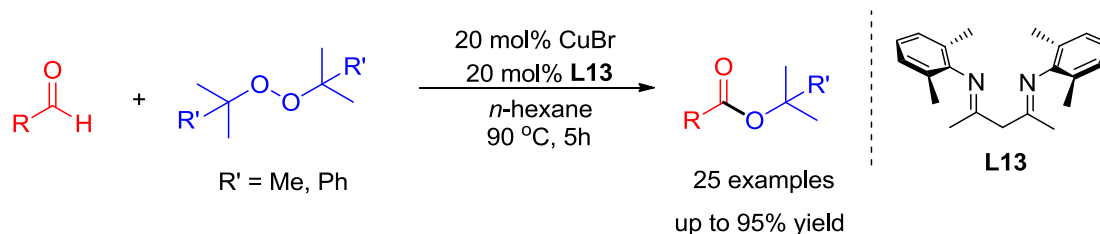

### Table of Contents

---

|                                                                                                   |    |
|---------------------------------------------------------------------------------------------------|----|
| 1. General considerations.....                                                                    | 2  |
| 2. Preparation of Mannich bases <b>L6-L9</b> and Imine <b>L13</b> .....                           | 3  |
| 3. General procedure for oxidative esterification reaction and reaction condition screenings..... | 3  |
| 4. Characterization data of esters tertiary alcohols.....                                         | 6  |
| 5. <sup>1</sup> H NMR and <sup>13</sup> C NMR spectra.....                                        | 12 |
| 6. References .....                                                                               | 23 |

## 1. General considerations

$^1\text{H}$  NMR spectra were obtained with TMS as internal standard in  $\text{CDCl}_3$  using a Bruker DRX 500 (500 MHz) spectrometer. Spectra were referenced internally to the residual proton resonance in  $\text{CDCl}_3$  ( $\delta$  7.26 ppm), or with tetramethylsilane (TMS,  $\delta$  7.26 ppm) as the internal standard. Chemical shifts ( $\delta$ ) were reported as part per million (ppm) in  $\delta$  scale downfield from TMS.  $^{13}\text{C}$  NMR spectra were referenced to  $\text{CDCl}_3$  ( $\delta$  77.0 ppm, the middle peak). Coupling constants ( $J$ ) were reported in Hertz (Hz). Gas chromatography (GC) analysis was performed on an Agilent GC-6820 chromatograph equipped with a  $30\text{ m} \times 0.32\text{ mm} \times 0.5\ \mu\text{m}$  HP-Innowax capillary column and aflame ionization detector. GC-MS spectra were recorded on Thermo Trace DSQ GC-MS spectrometer using a TRB-5MS ( $30\text{ m} \times 0.25\text{ mm} \times 0.25\ \mu\text{m}$ ) column. Melting points were determined on a Yamato melting apparatus Model MP-21. Progress of the reactions was followed by TLC (silica gel polygrams SIL G/UV 254 plates). Column chromatography was performed using Silicycle (40-60 mm) silica gel. The chemicals were purchased from commercial suppliers (Shanghai Chemical Company, China) and were used without purification prior to use.

## 2. Preparation of Mannich base **L6** and imine **L9**

Mannich bases **L6** were prepared from their corresponding phenols, formaldehyde and amines according to the literature method without modifications.<sup>[1]</sup>

Imine **L13** was prepared from 2,4-pentanedione and 2,6-dimethylbenzenamine according to the literature method without modifications.<sup>[2]</sup>

## 3. General procedure for oxidative esterification reaction

A mixture of aldehyde **1** (0.5 mmol), DTBP (0.3 mL) or other peroxide (1.5 mmol), CuBr (14.4 mg, 0.1 mmol, 20 mol%) and imine **L13** (30.6 mg, 0.1 mmol, 20 mol%) in *n*-hexane (3 mL) was sealed in a Teflon septum screw-capped tube under N<sub>2</sub>. The mixture was stirred in an oil bath at 90 °C for 5h. After cooling to room temperature, the mixture was filtered, and the filtrate was evaporated in vacuo. The residue was purified by flash column chromatography (silica gel, ethyl acetate/petroleum ether = 1:20 as an eluent) to afford the desired esters of tertiary alcohols **3**.

**Table S1** Ligand survey for copper-catalyzed direct esterification of benzaldehyde with DTPB<sup>a</sup>

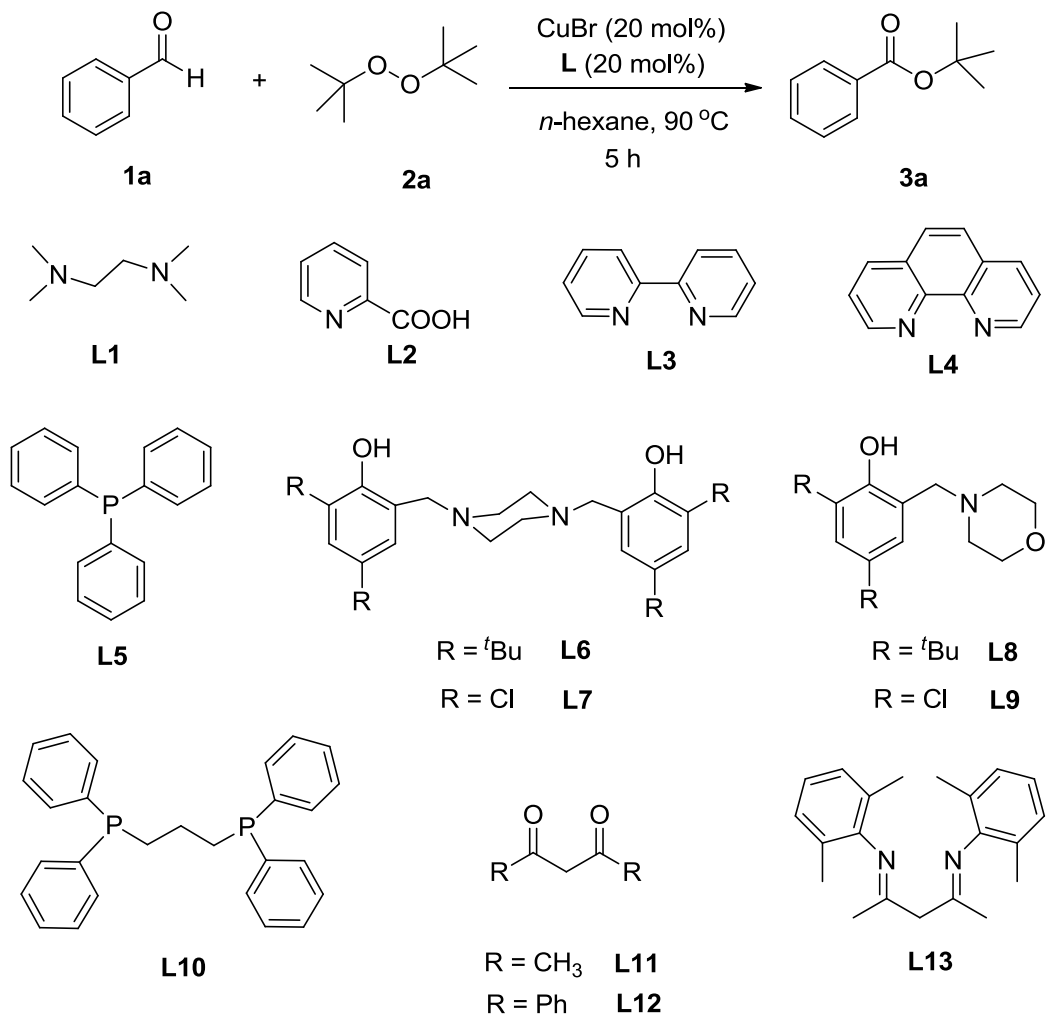

| Entry | Ligand    | Yield <sup>b</sup> [%] | Entry | Ligand     | Yield <sup>b</sup> [%] |
|-------|-----------|------------------------|-------|------------|------------------------|
| 1     |           | 0                      | 8     | <b>L7</b>  | <5                     |
| 2     | <b>L1</b> | 0                      | 9     | <b>L8</b>  | <5                     |
| 3     | <b>L2</b> | 0                      | 10    | <b>L9</b>  | <5                     |
| 4     | <b>L3</b> | 0                      | 11    | <b>L10</b> | 15                     |
| 5     | <b>L4</b> | 0                      | 12    | <b>L11</b> | 26                     |
| 6     | <b>L5</b> | 0                      | 13    | <b>L12</b> | 20                     |
| 7     | <b>L6</b> | <5                     | 14    | <b>L13</b> | 92(87 <sup>c</sup> )   |

<sup>a</sup> Reaction conditions: A mixture of benzaldehyde (**1a**, 0.5 mmol), CuBr (20 mol%), ligand (20 mol%) and DTBP (**2a**, 0.3 mL) in *n*-hexane (3 mL) was stirred at 90 °C for 5 h under N<sub>2</sub>.

<sup>b</sup> Yield determined by GC.

<sup>c</sup> Isolated yield.

**Table S2** Optimization of reaction conditions for the preparation of **3a** in the presence of **L13**<sup>a</sup>

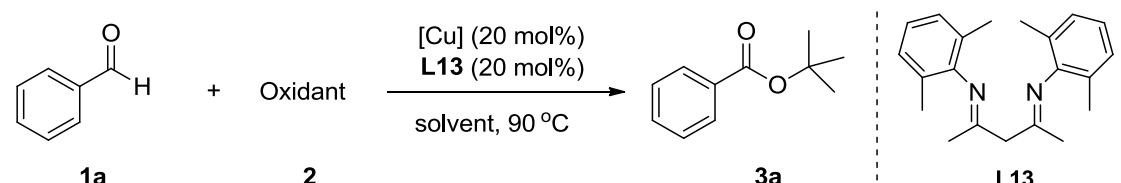

| Entry | [Cu]                  | Oxidant                                      | Solvent                              | Yield <sup>b</sup> (%) |
|-------|-----------------------|----------------------------------------------|--------------------------------------|------------------------|
| 1     |                       | DTBP                                         | <i>n</i> -hexane                     | 0                      |
| 2     | CuI                   | DTBP                                         | <i>n</i> -hexane                     | 82                     |
| 3     | CuCl                  | DTBP                                         | <i>n</i> -hexane                     | 85                     |
| 4     | <b>CuBr</b>           | DTBP                                         | <b><i>n</i>-hexane</b>               | <b>87</b>              |
| 5     | CuBr                  | DTBP                                         | <i>n</i> -hexane                     | 67 <sup>d</sup>        |
| 6     | Cu <sub>2</sub> O     | DTBP                                         | <i>n</i> -hexane                     | 27                     |
| 7     | Cu(OAc) <sub>2</sub>  | DTBP                                         | <i>n</i> -hexane                     | 0                      |
| 8     | CuCl <sub>2</sub>     | DTBP                                         | <i>n</i> -hexane                     | 78                     |
| 9     | Cu(acac) <sub>2</sub> | DTBP                                         | <i>n</i> -hexane                     | 0                      |
| 10    | CuBr                  | DTBP                                         | toluene                              | <5 <sup>c</sup>        |
| 11    | CuBr                  | DTBP                                         | ClCH <sub>2</sub> CH <sub>2</sub> Cl | <5 <sup>c</sup>        |
| 12    | CuBr                  | DTBP                                         | cyclohexane                          | <5 <sup>c</sup>        |
| 13    | CuBr                  | DTBP                                         | 1,4-dioxane                          | 0                      |
| 14    | CuBr                  | TBHP                                         | <i>n</i> -hexane                     | <5 <sup>c</sup>        |
| 15    | CuBr                  | <i>t</i> -butyl perbenzoate                  | <i>n</i> -hexane                     | 36                     |
| 16    | CuBr                  | O <sub>2</sub>                               | <i>n</i> -hexane                     | 0 <sup>e</sup>         |
| 17    | CuBr                  | H <sub>2</sub> O <sub>2</sub>                | <i>n</i> -hexane                     | 0 <sup>e</sup>         |
| 18    | CuBr                  | K <sub>2</sub> S <sub>2</sub> O <sub>4</sub> | <i>n</i> -hexane                     | 0 <sup>e</sup>         |
| 19    | CuBr                  | NHPI                                         | <i>n</i> -hexane                     | 0 <sup>e</sup>         |
| 20    | CuBr                  | DTBP                                         | <i>n</i> -hexane                     | 62 <sup>f</sup>        |
| 21    | CuBr                  | DTBP                                         | <i>n</i> -hexane                     | 71 <sup>g</sup>        |

<sup>a</sup> Reaction conditions: A mixture of benzaldehyde (**1a**, 0.5 mmol), [Cu] (20 mol%), **L13** (20 mol%) and DTBP (**2a**, 0.3 mL) in *n*-hexane (3 mL) was stirred at 90 °C for 5 h under N<sub>2</sub>.

<sup>b</sup> Isolated yield.

<sup>c</sup> Yield determined by GC.

<sup>d</sup> 10 mol% CuBr and 10 mol% **L13** were used.

<sup>e</sup> 0.3ml *tert*-butanol were used in the reaction.

<sup>f</sup> The reaction temperature was 70 °C.

<sup>g</sup> 0.2 mL DTBP was used.

## 4 Characterization data of esters of tertiary Alcohols

Benzyl benzoate (Table 1, product **2a**)<sup>[3]</sup>

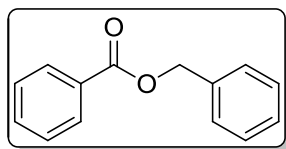

According to the general procedure A, compound **3a** was obtained in 90% yield.

Hexane: EtOAc = 20:1,  $R_f$  = 0.4

$^1\text{H NMR}$  (500 MHz,  $\text{CDCl}_3$ )  $\delta$  = 8.12 (d,  $J$  = 7.3 Hz, 2 H), 7.58 (t,  $J$  = 7.4 Hz, 1 H), 7.49-7.35 (m, 7 H), 5.40 (s, 2 H) ppm.

GC-MS (EI, 70eV): 212.

4-Methylbenzyl 4-methylbenzoate (Table 1, **2b**)<sup>[4]</sup>

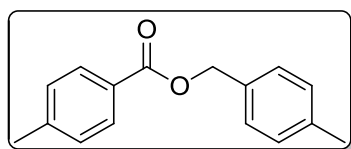

According to the general procedure A, compound **2b** was obtained in 89% yield.

Hexane: EtOAc = 20:1,  $R_f$  = 0.4

$^1\text{H NMR}$  (500 MHz,  $\text{CDCl}_3$ )  $\delta$  = 7.97 (d,  $J$  = 8.1 Hz, 2 H), 7.35 (d,  $J$  = 7.8 Hz, 2 H), 7.26-7.20 (m, 4 H), 5.32 (s, 2 H), 2.41 (s, 3 H), 2.37 (s, 3 H) ppm.

GC-MS (EI, 70eV): 240.

*Tert*-butyl 4-methoxybenzoate (Table 1, **3c**)<sup>[3]</sup>

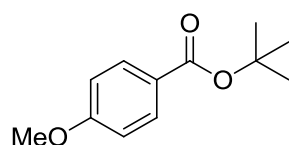

According to the general procedure, compound **3c** was obtained in 95% (98.8 mg) yield.

Hexane: EtOAc = 20:1,  $R_f$  = 0.3

$^1\text{H NMR}$  (500 MHz,  $\text{CDCl}_3$ )  $\delta$  7.95 (d,  $J$  = 9.0 Hz, 2H), 6.90 (d,  $J$  = 9.0 Hz, 2H), 3.85 (s, 3H), 1.59 (s, 9H)

*Tert*-butyl 4-ethoxybenzoate (Table 1, **3d**)

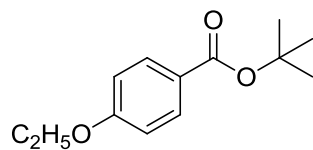

According to the general procedure, compound **3d** was obtained in 95% (103.3 mg) yield.

Hexane: EtOAc = 20:1,  $R_f$  = 0.27

$^1\text{H NMR}$  (500 MHz,  $\text{CDCl}_3$ )  $\delta$  7.93 (d,  $J$  = 9.0 Hz, 2H), 6.88 (d,  $J$  = 9.0 Hz, 2H), 4.08 (q,  $J$  = 7.0 Hz, 2H), 1.58 (s, 9H), 1.43 (t,  $J$  = 7.0 Hz, 3H)

*Tert*-butyl 3,4-dimethoxybenzoate (Table 1, **3e**)<sup>[3]</sup>

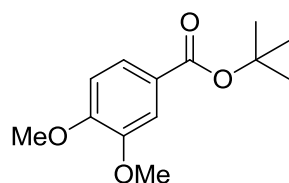

According to the general procedure, compound **3e** was obtained in 92% (109.5 mg) yield.

Hexane: EtOAc = 20:1,  $R_f$  = 0.15

$^1\text{H NMR}$  (500 MHz,  $\text{CDCl}_3$ )  $\delta$  7.59 (dd,  $J$  = 8.4, 2.0 Hz, 1H), 7.48 (d,  $J$  = 2.0 Hz, 1H), 6.83 (d,  $J$  = 8.4 Hz, 2H), 3.89 (s, 3H), 3.88 (s, 3H), 1.56 (s, 9H)

*Tert*-butyl 3-phenoxybenzoate (Table 1, **3f**)

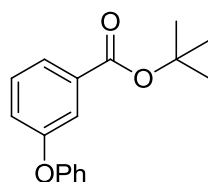

According to the general procedure, compound **3f** was obtained in 91% (123.0 mg) yield.

Hexane: EtOAc = 20:1,  $R_f$  = 0.4

$^1\text{H NMR}$  (500 MHz,  $\text{CDCl}_3$ )  $\delta$  7.73-7.71 (m, 1H), 7.63-7.62 (m, 1H), 7.38-7.33 (m, 3H), 7.17-7.12 (m, 2H), 7.01-6.99 (m, 2H), 1.57 (s, 9H)

*Tert*-butyl 4-chlorobenzoate (Table 1, **3g**)<sup>[3]</sup>

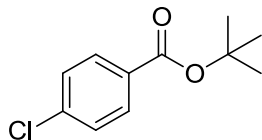

According to the general procedure, compound **3g** was obtained in 86% (91.2 mg) yield.

Hexane: EtOAc = 20:1,  $R_f = 0.4$

$^1\text{H NMR}$  (500 MHz,  $\text{CDCl}_3$ )  $\delta$  7.92 (d,  $J = 8.6$  Hz, 2H), 7.38 (d,  $J = 8.6$  Hz, 2H), 1.62 (s, 9H)

*Tert*-butyl 4-bromobenzoate (Table 1, **3h**)<sup>[5]</sup>

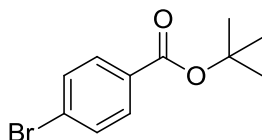

According to the general procedure, compound **3h** was obtained in 89% (114.0 mg) yield.

Hexane: EtOAc = 20:1,  $R_f = 0.4$

$^1\text{H NMR}$  (500 MHz,  $\text{CDCl}_3$ )  $\delta$  7.85 (d,  $J = 8.6$  Hz, 2H), 7.54 (d,  $J = 8.6$  Hz, 2H), 1.59 (s, 9H)

*Tert*-butyl 4-(trifluoromethyl)benzoate (Table 1, **3i**)<sup>[3]</sup>

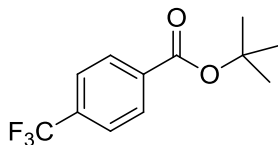

According to the general procedure, compound **3i** was obtained in 76% (93.5 mg) yield.

Hexane: EtOAc = 20:1,  $R_f = 0.35$

$^1\text{H NMR}$  (500 MHz,  $\text{CDCl}_3$ )  $\delta$  8.10 (d,  $J = 8.6$  Hz, 2H), 7.68 (d,  $J = 8.6$  Hz, 2H), 1.62 (s, 9H)



*Tert*-butyl 1-naphthoate (Table 1, **3k**)<sup>[3]</sup>

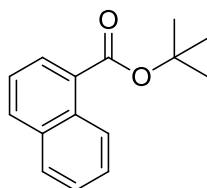

According to the general procedure, compound **3k** was obtained in 82% (93.5 mg) yield.

Hexane: EtOAc = 20:1,  $R_f$  = 0.4

$^1\text{H NMR}$  (500 MHz,  $\text{CDCl}_3$ )  $\delta$  8.85 (d,  $J$  = 8.2 Hz, 1H), 8.08 (dd,  $J$  = 7.3, 1.3 Hz, 1H), 7.97 (d,  $J$  = 8.3 Hz, 1H), 7.86 (d,  $J$  = 7.5 Hz, 1H), 7.59-7.46 (m, 3H), 1.68 (s, 9H)

*Tert*-butyl 2-methylbenzoate (Table 1, **3l**)<sup>[3]</sup>

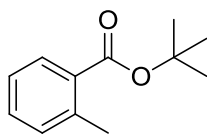

According to the general procedure, compound **3l** was obtained in 78% (74.9 mg) yield.

Hexane: EtOAc = 20:1,  $R_f$  = 0.4

$^1\text{H NMR}$  (500 MHz,  $\text{CDCl}_3$ )  $\delta$  7.82-7.81 (m, 1H), 7.37-7.34 (m, 1H), 7.23-7.20 (m, 2H), 2.57 (s, 3H), 1.60 (s, 9H)

*Tert*-butyl furan-2-carboxylate (Table 1, **3o**)<sup>[3]</sup>

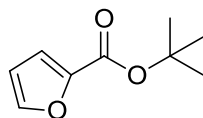

According to the general procedure, compound **3o** was obtained in 83% (69.7 mg) yield.

Hexane: EtOAc = 20:1,  $R_f$  = 0.4

$^1\text{H NMR}$  (500 MHz,  $\text{CDCl}_3$ )  $\delta$  7.54 (q,  $J$  = 0.9 Hz, 1H), 7.08 (dd,  $J$  = 3.5, 0.9 Hz, 1H), 6.47 (q,  $J$  = 1.8 Hz, 1H), 1.59 (s, 9H)

*Tert*-butyl thiophene-2-carboxylate (Table 1, **3p**)<sup>[3]</sup>

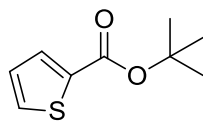

According to the general procedure, compound **3o** was obtained in 86% (79.1 mg) yield.

Hexane: EtOAc = 20:1,  $R_f$  = 0.4

$^1\text{H NMR}$  (500 MHz,  $\text{CDCl}_3$ )  $\delta$  7.72 (dd,  $J$  = 3.7, 1.3 Hz, 1H), 7.49 (dd,  $J$  = 5.0, 1.3 Hz, 1H), 7.08-7.06 (m, 1H), 1.59 (s, 9H)

2-phenylpropan-2-yl 4-methylbenzoate (Table 2, **3s**)

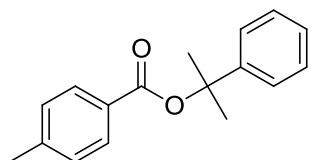

According to the general procedure, compound **3r** was obtained in 76% (96.5 mg) yield.

Colorless oil

Hexane: EtOAc = 20:1,  $R_f$  = 0.5

$^1\text{H NMR}$  (500 MHz,  $\text{CDCl}_3$ )  $\delta$  7.98 (d,  $J$  = 8.3 Hz, 2H), 7.47-7.44 (m, 2H), 7.38-7.35 (m, 2H), 7.29-7.25 (m, 3H), 2.43 (s, 3H), 1.94 (s, 6H);  $^{13}\text{C NMR}$  (125 MHz,  $\text{CDCl}_3$ )  $\delta$  165.2, 146.0, 143.3, 129.7 (2C), 129.0 (2C), 128.4 (2C), 127.0, 125.9 (2C), 124.4, 82.0, 28.9 (2C), 21.7

GC-MS (EI, 70eV): 254.

2-phenylpropan-2-yl 4-methoxybenzoate (Table 2, **3t**)

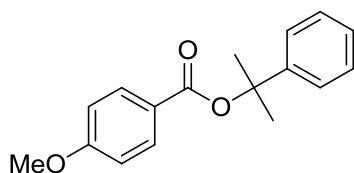

According to the general procedure, compound **3s** was obtained in 85% (114.8 mg) yield.

Colorless oil

Hexane: EtOAc = 20:1,  $R_f$  = 0.5

$^1\text{H NMR}$  (500 MHz,  $\text{CDCl}_3$ )  $\delta$  8.05-8.03 (m, 2H), 7.48-7.46 (m, 2H), 7.38-7.35 (m, 2H), 7.30-7.26 (m, 1H), 6.96-6.94 (m, 2H), 3.88 (s, 3H), 1.94 (s, 6H);  $^{13}\text{C NMR}$  (125 MHz,  $\text{CDCl}_3$ )  $\delta$  165.0, 163.2, 146.1, 131.6 (2C), 128.4 (2C), 127.0 (2C), 124.3, 124.0, 113.6 (2C), 81.8, 55.5, 28.9 (2C);

GC-MS (EI, 70eV): 270.

2-phenylpropan-2-yl 4-ethoxybenzoate (Table 2, **3u**)

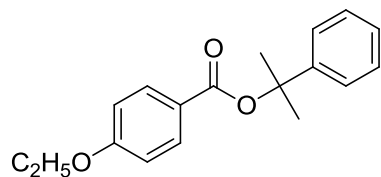

According to the general procedure, compound **3t** was obtained in 83% (117.9 mg) yield.

Colorless oil

Hexane: EtOAc = 20:1,  $R_f = 0.5$

$^1\text{H NMR}$  (500 MHz,  $\text{CDCl}_3$ )  $\delta$  8.04-8.02 (m, 2H), 7.47-7.45 (m, 2H), 7.38-7.35 (m, 2H), 7.29-7.27 (m, 1H), 6.94-6.92 (m, 2H), 3.88 (s, 3H), 4.11 (q,  $J = 7.0$  Hz, 2H), 1.94 (s, 6H), 1.47 (t,  $J = 7.0$  Hz, 3H);  $^{13}\text{C NMR}$  (125 MHz,  $\text{CDCl}_3$ )  $\delta$  165.0, 162.6, 146.1, 131.6 (2C), 128.3 (2C), 127.0 (2C), 124.3, 123.8, 114.0 (2C), 81.8, 63.7, 28.9, 14.8;

GC-MS (EI, 70eV): 284.

2-phenylpropan-2-yl 4-bromobenzoate (Table 2, **3v**)

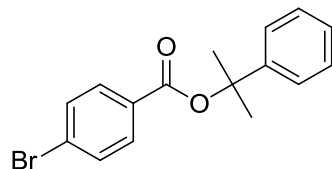

According to the general procedure, compound **3u** was obtained in 74% (117.7 mg) yield.

Colorless oil

Hexane: EtOAc = 20:1,  $R_f = 0.5$

$^1\text{H NMR}$  (500 MHz,  $\text{CDCl}_3$ )  $\delta$  7.90-7.88 (m, 2H), 7.57-7.56 (m, 2H), 7.42-7.40 (m, 2H), 7.35-7.32 (m, 2H), 7.27-7.24 (m, 1H), 1.91 (s, 6H);  $^{13}\text{C NMR}$  (125 MHz,  $\text{CDCl}_3$ )  $\delta$  164.4, 145.6, 131.6 (2C), 131.1 (2C), 130.4, 128.4 (2C), 127.8, 127.2 (2C), 124.3, 82.7, 28.7 (2C)

GC-MS (EI, 70eV): 318.

## 5. $^1\text{H}$ and $^{13}\text{C}$ NMR spectra

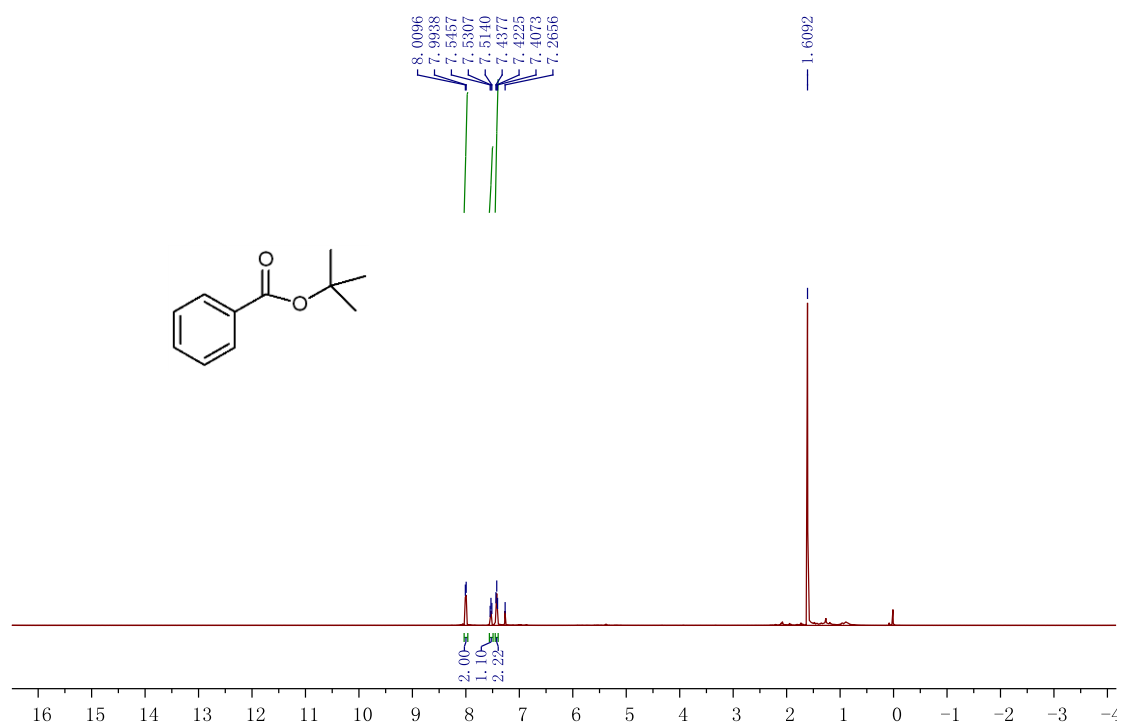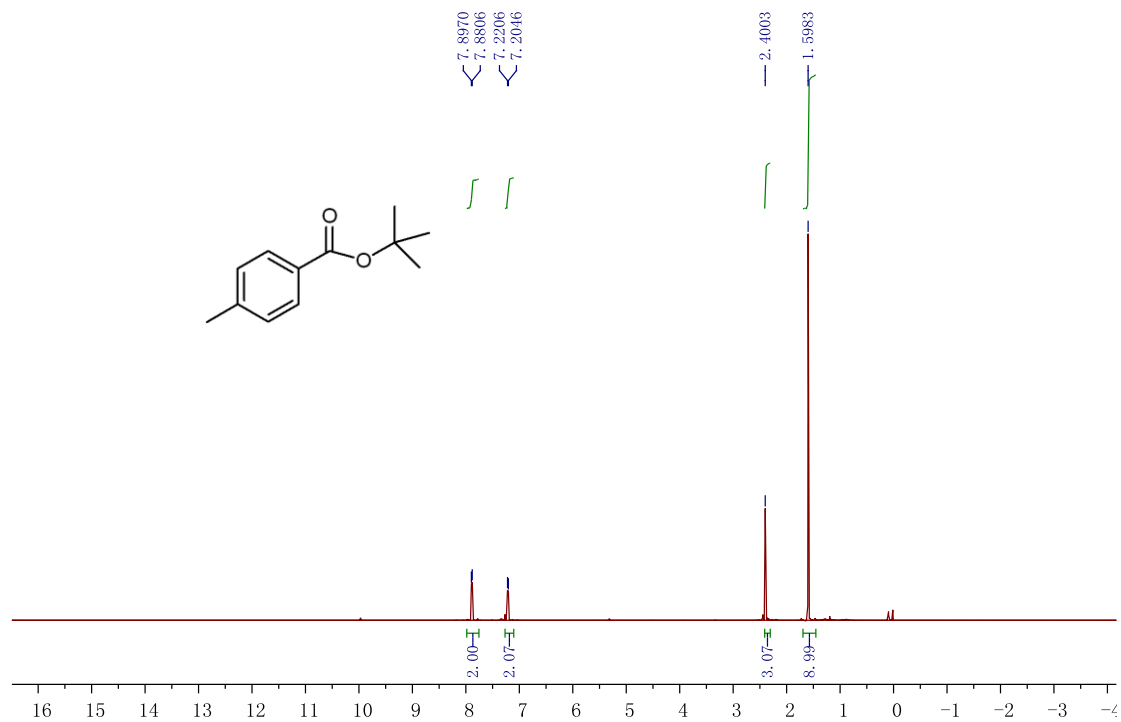

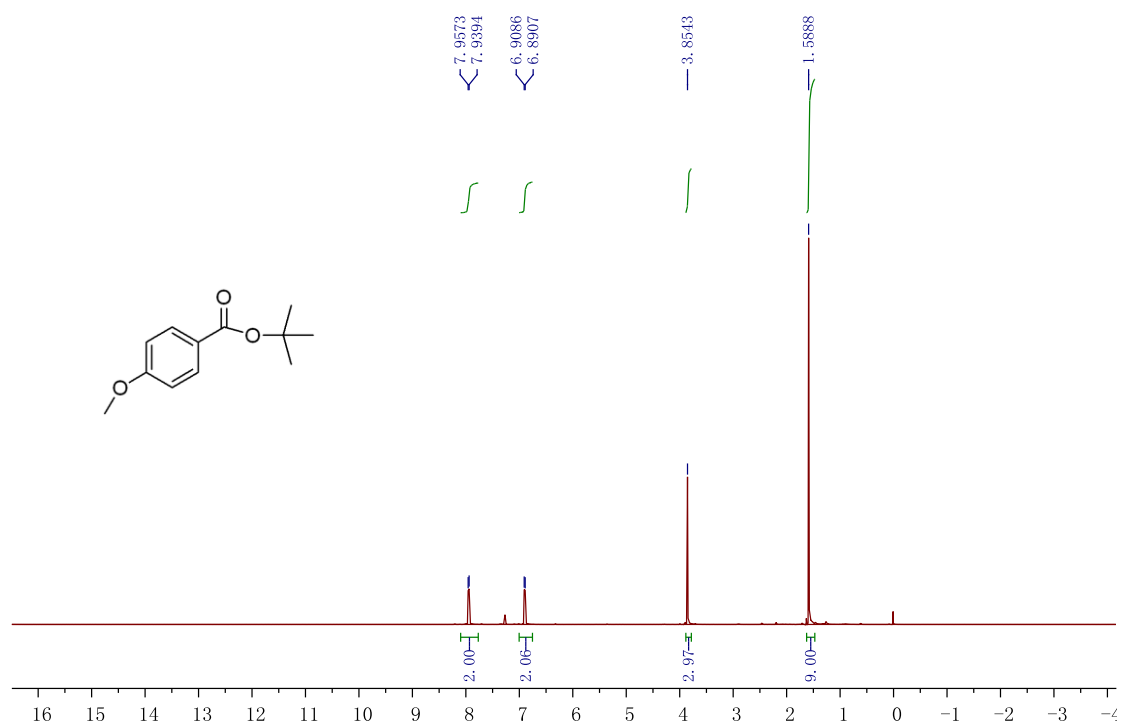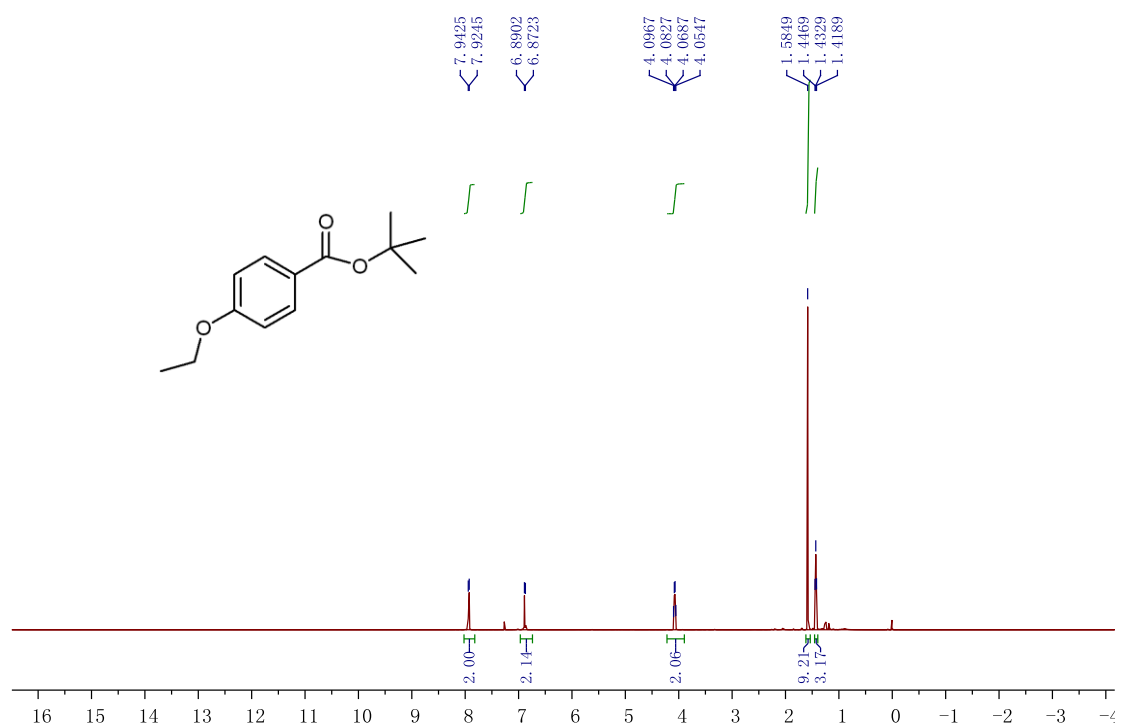

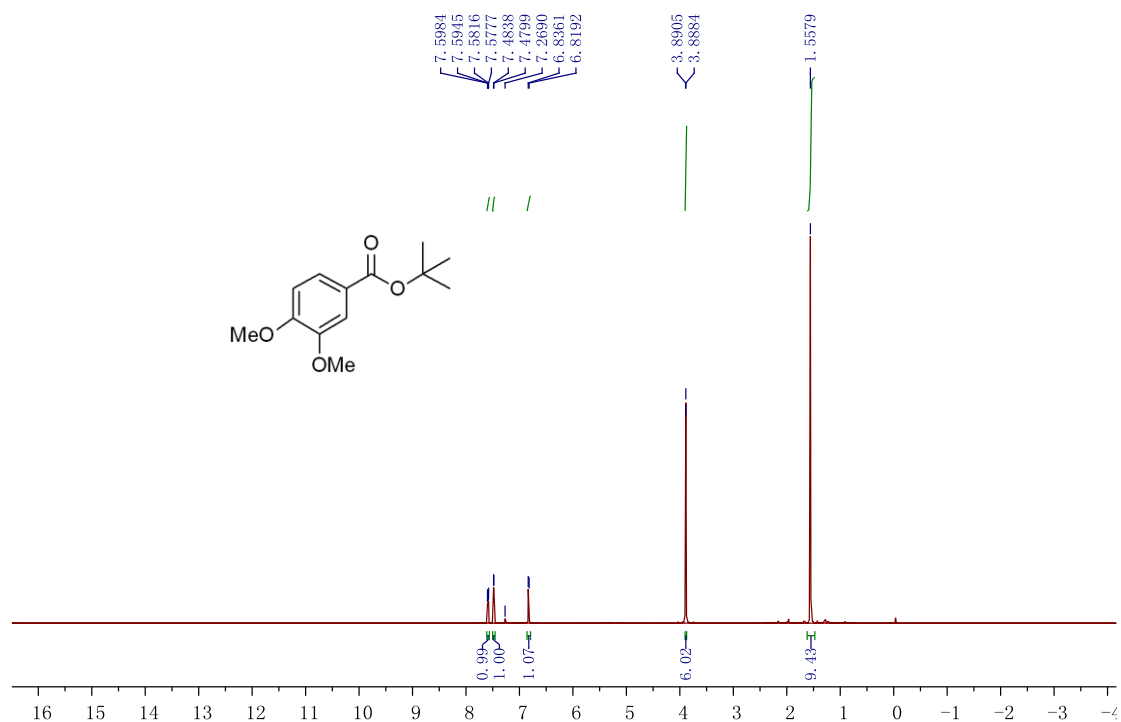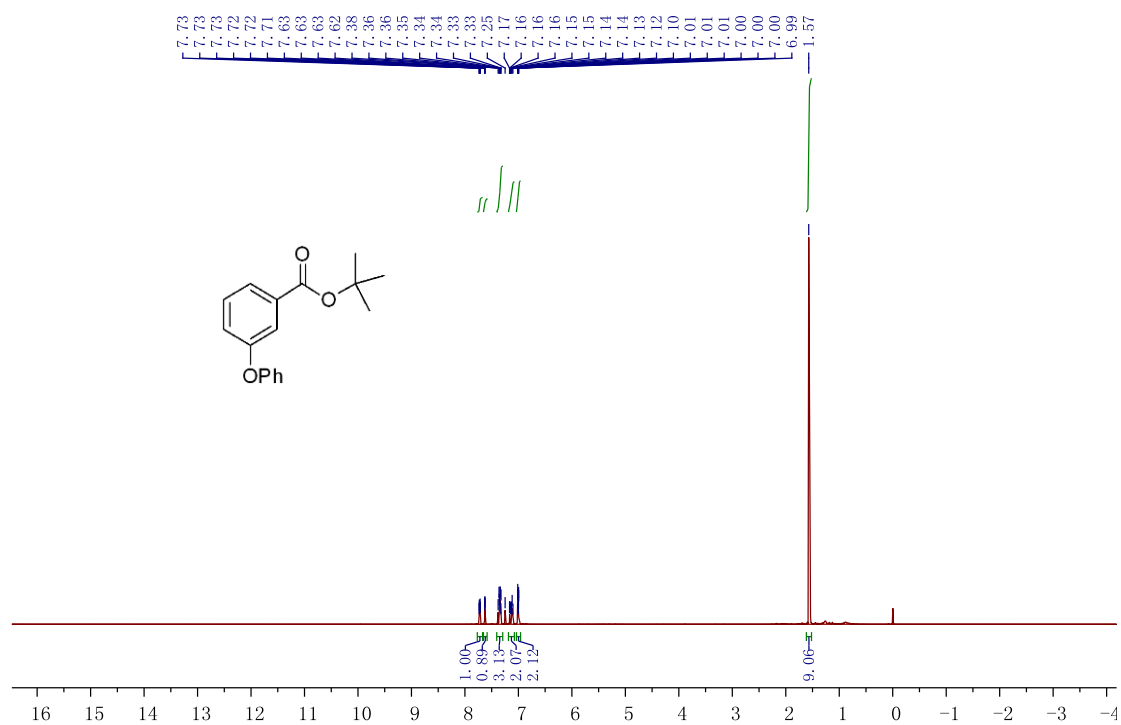

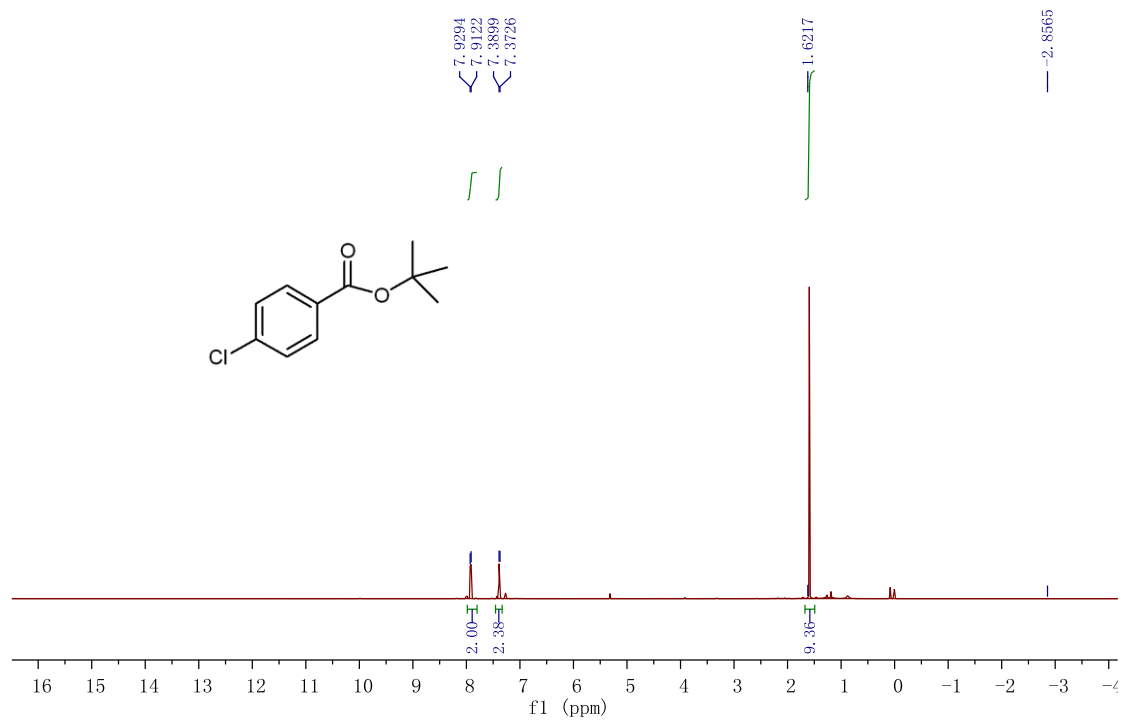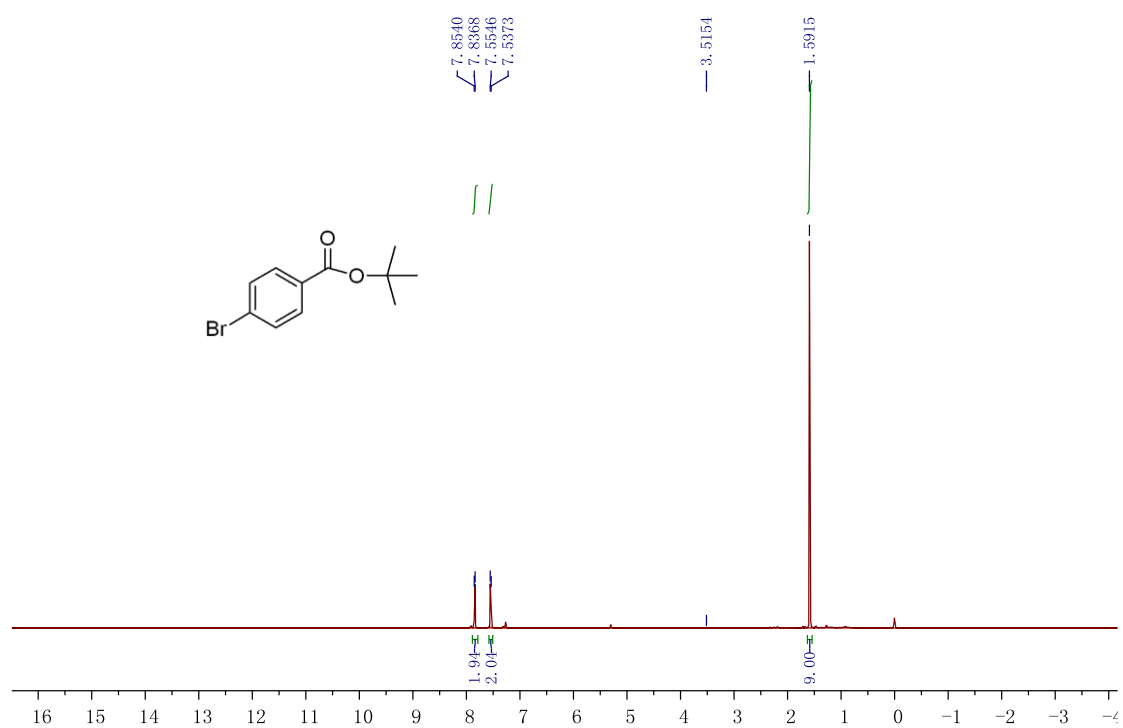

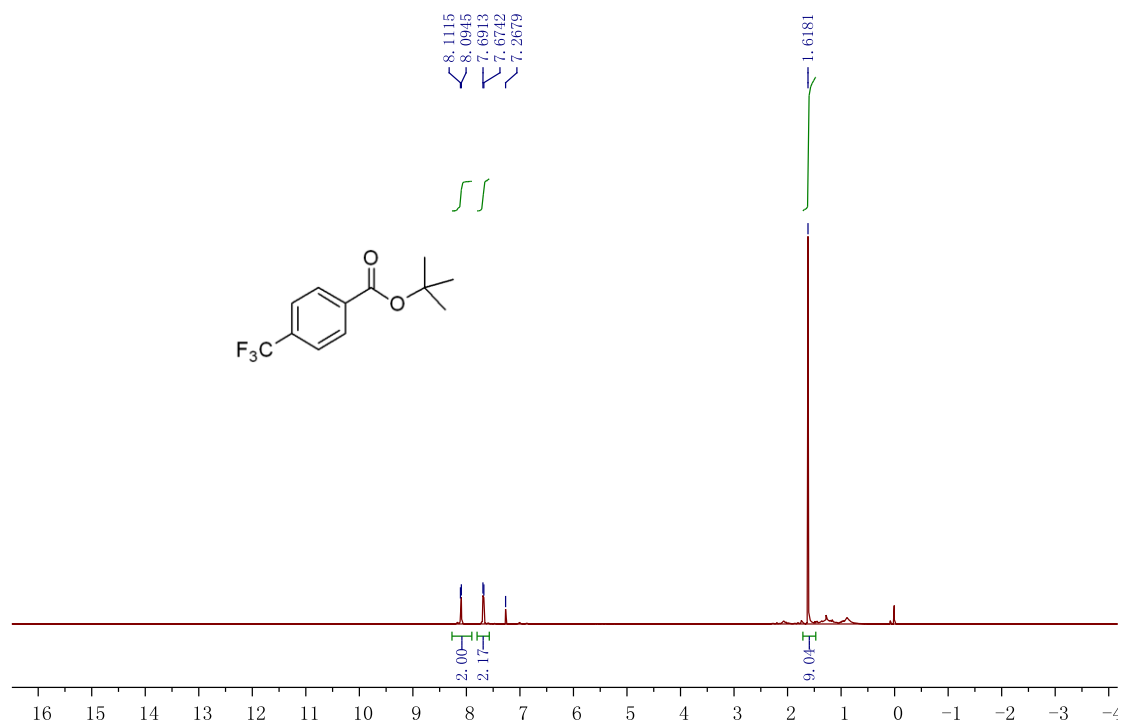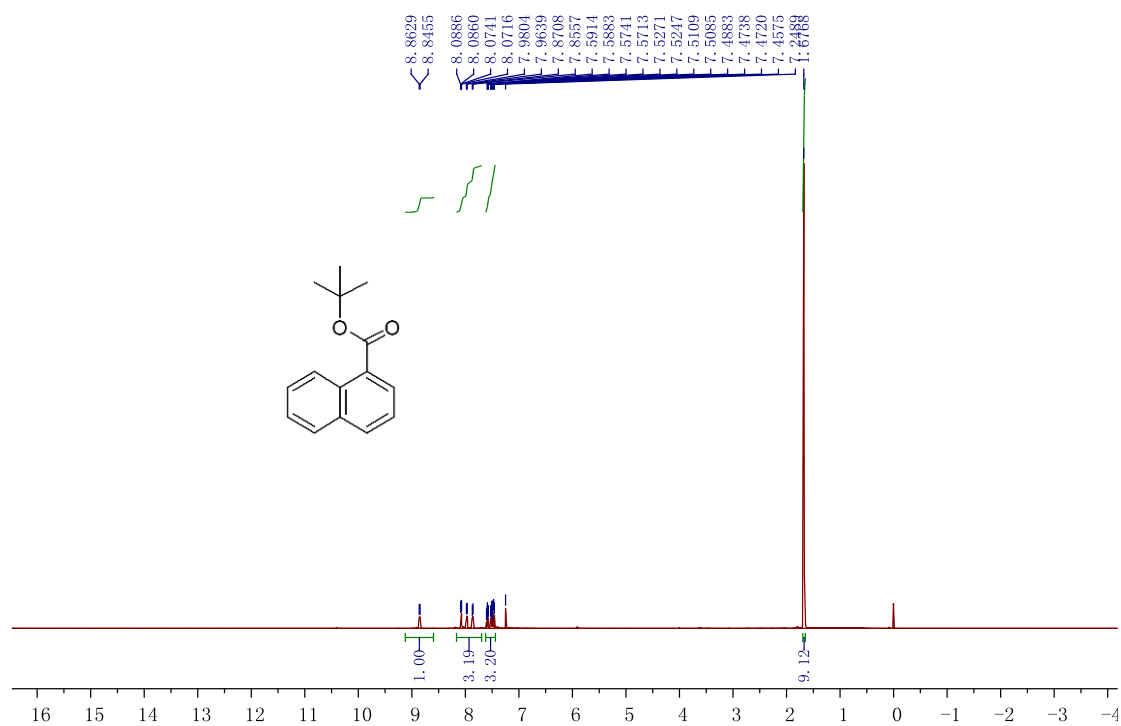



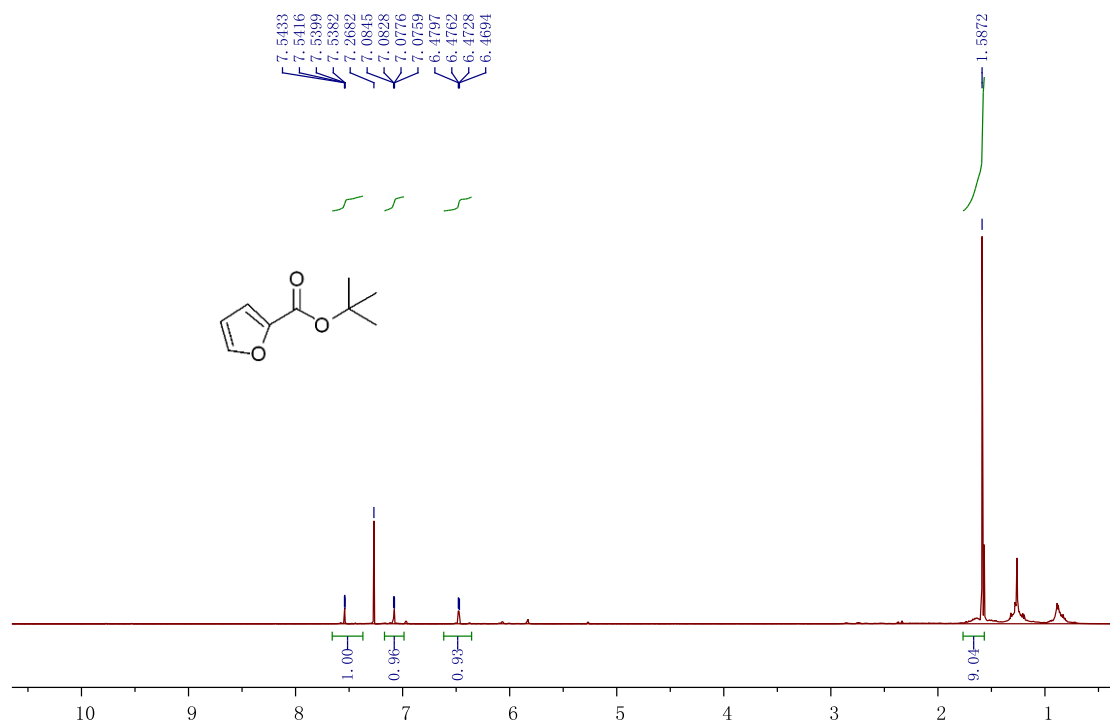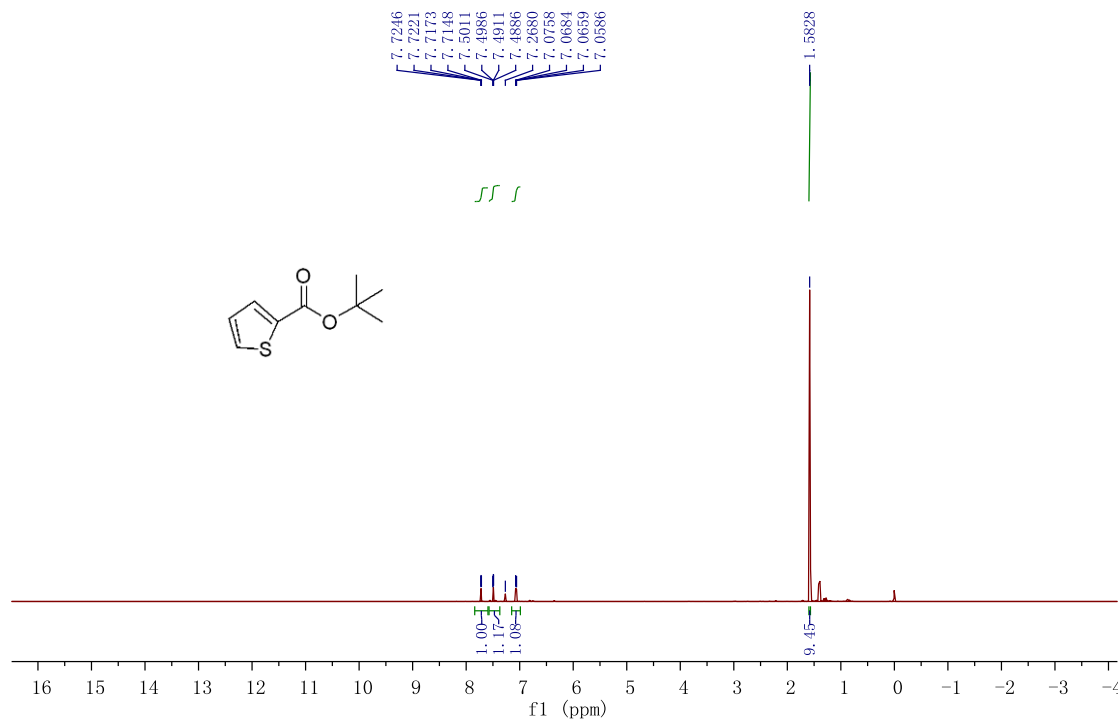

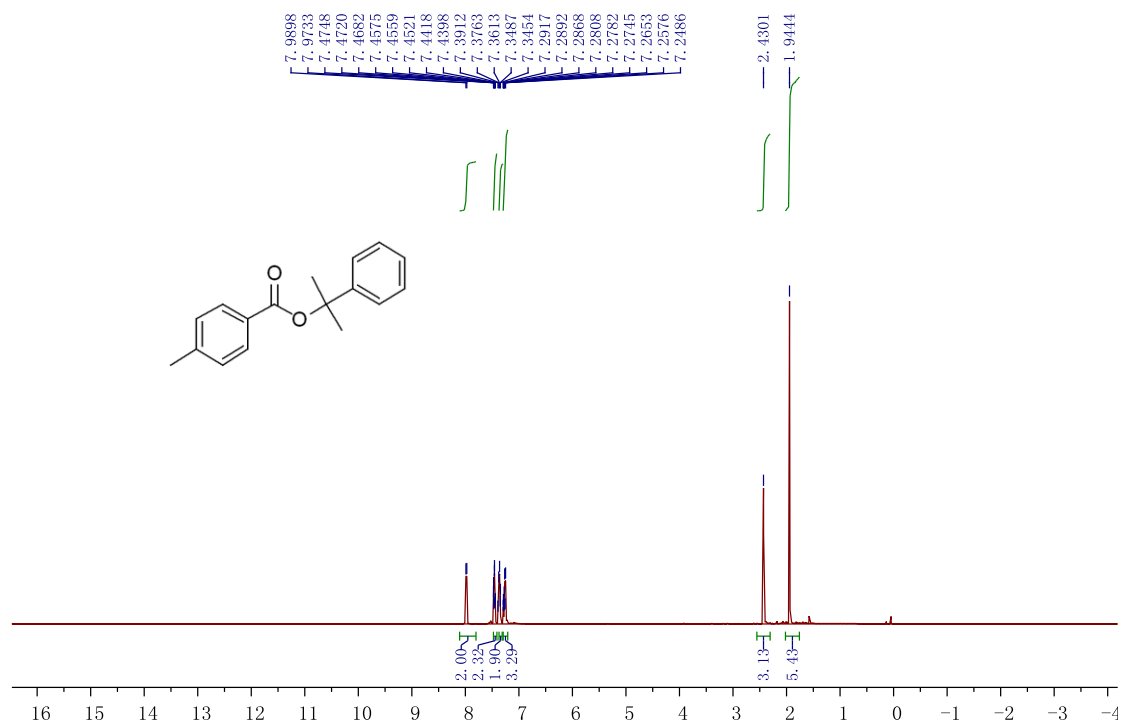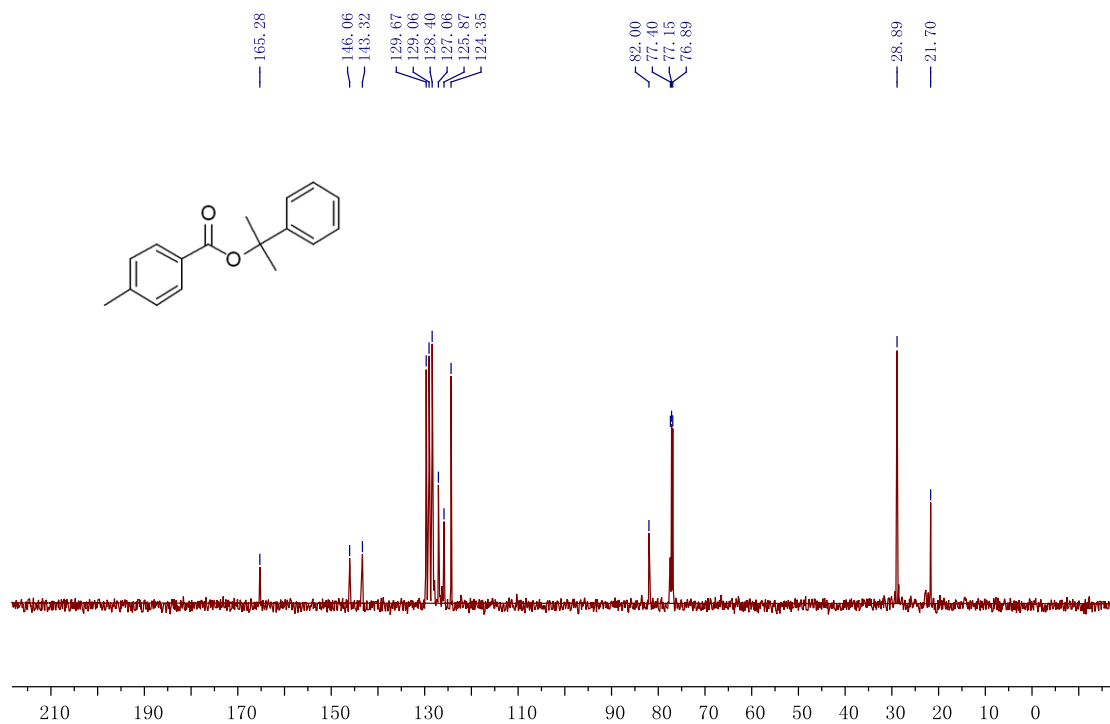

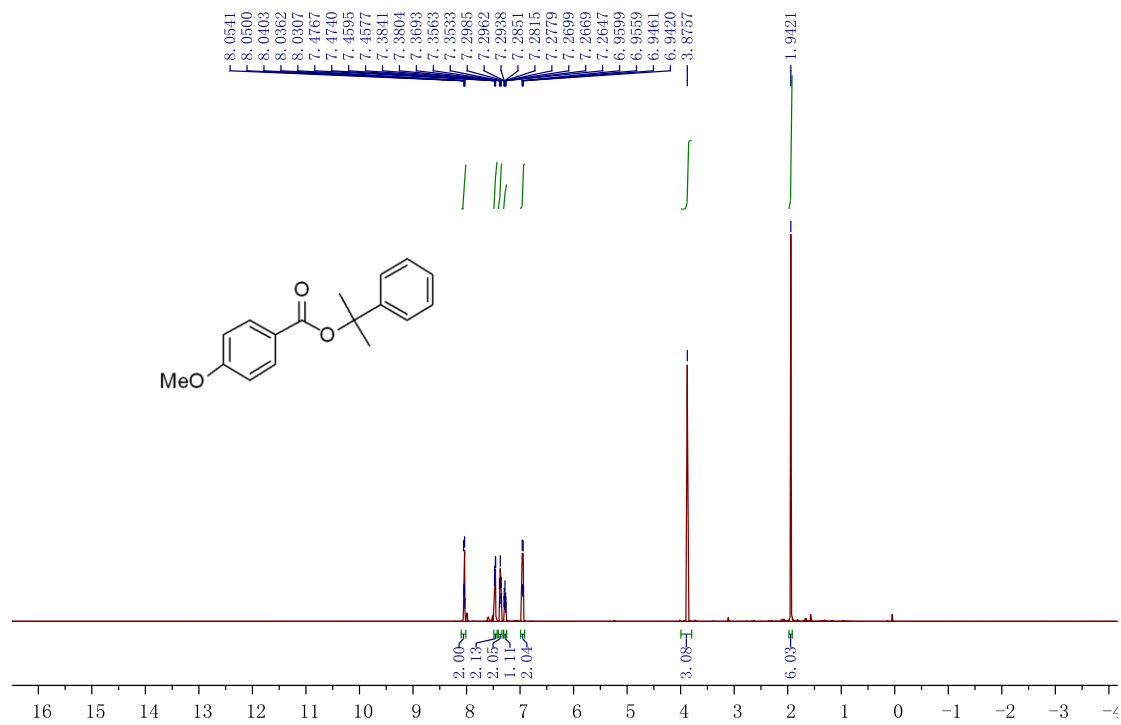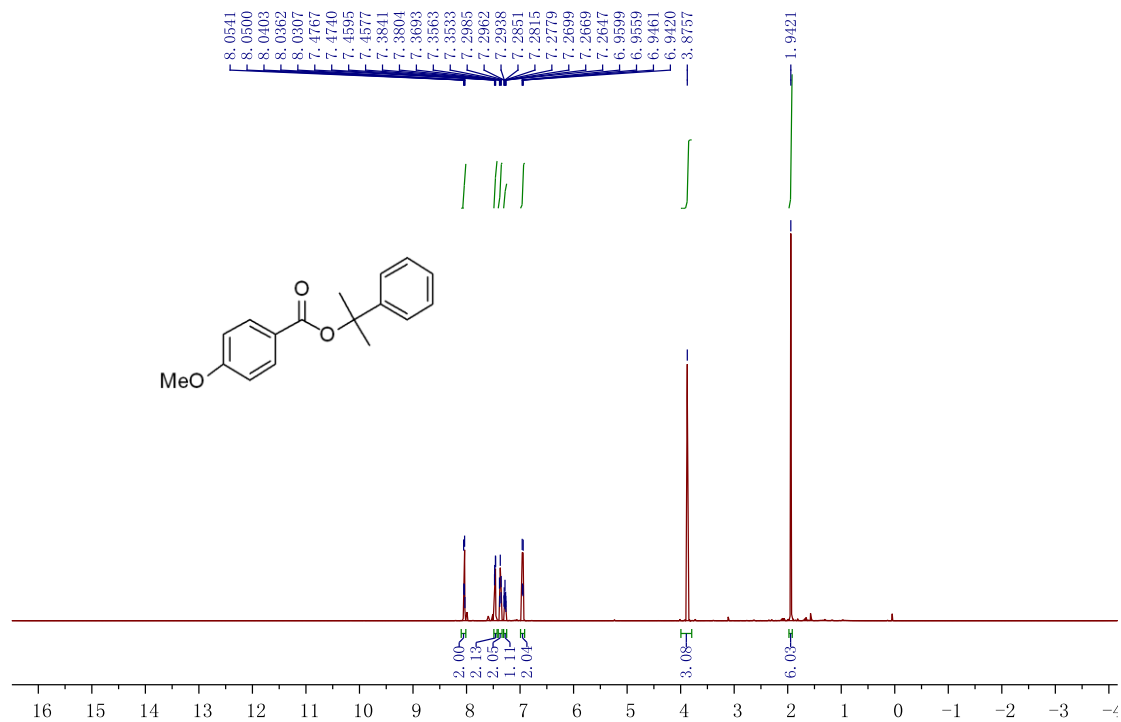

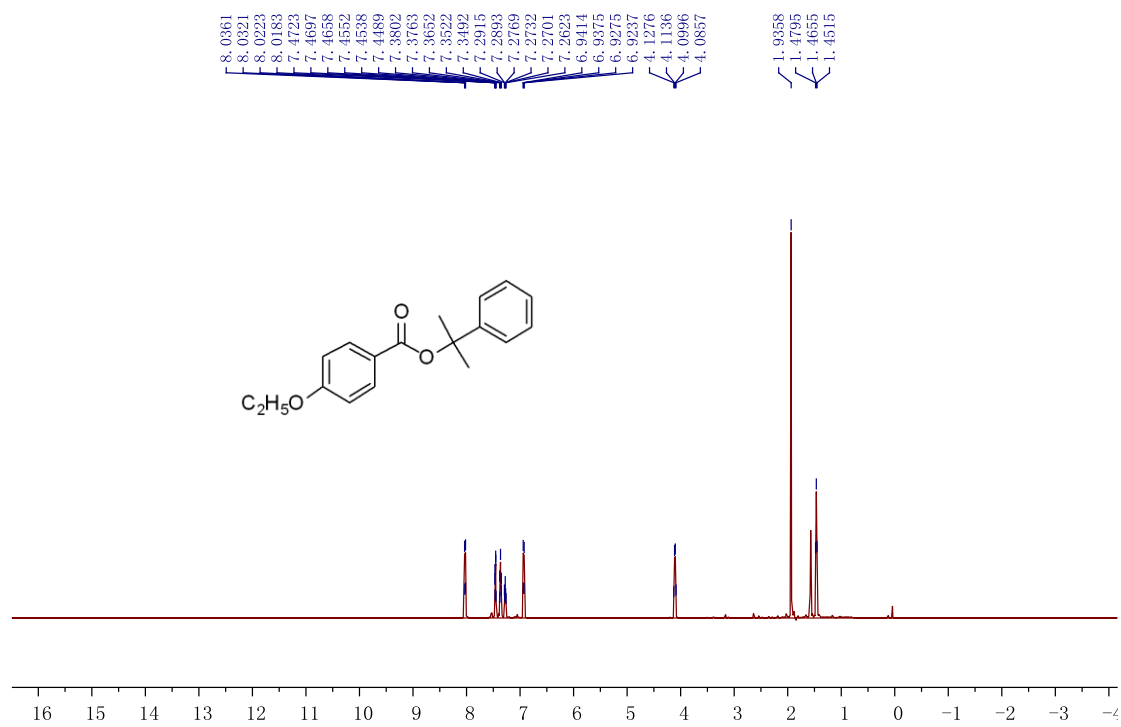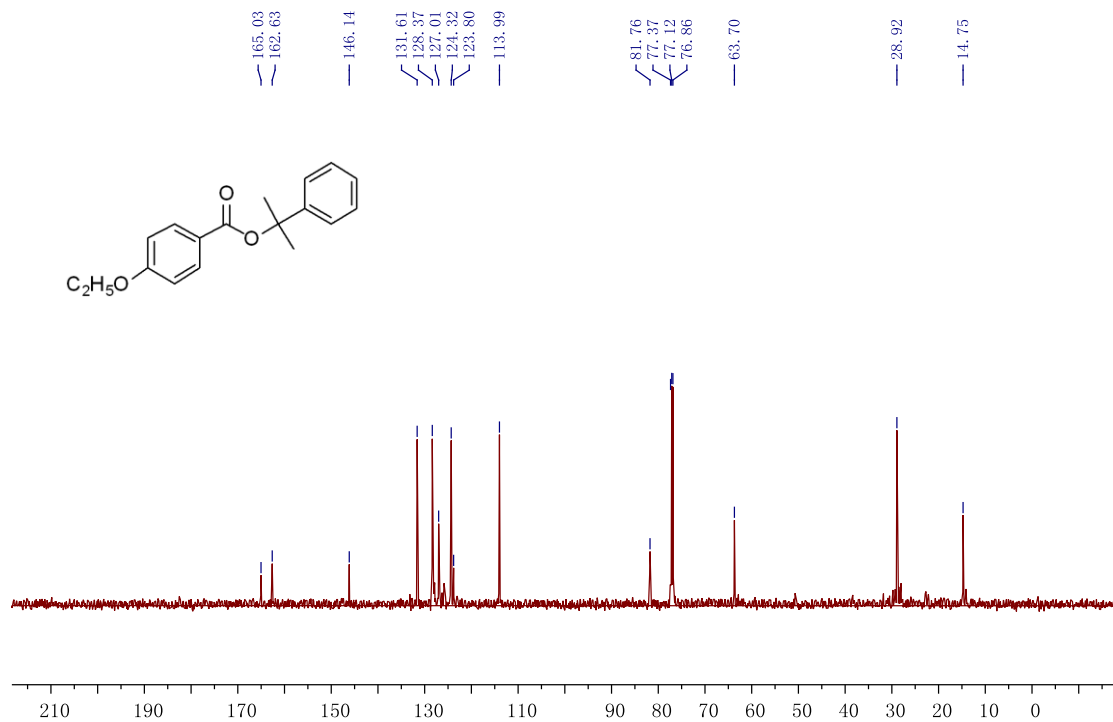

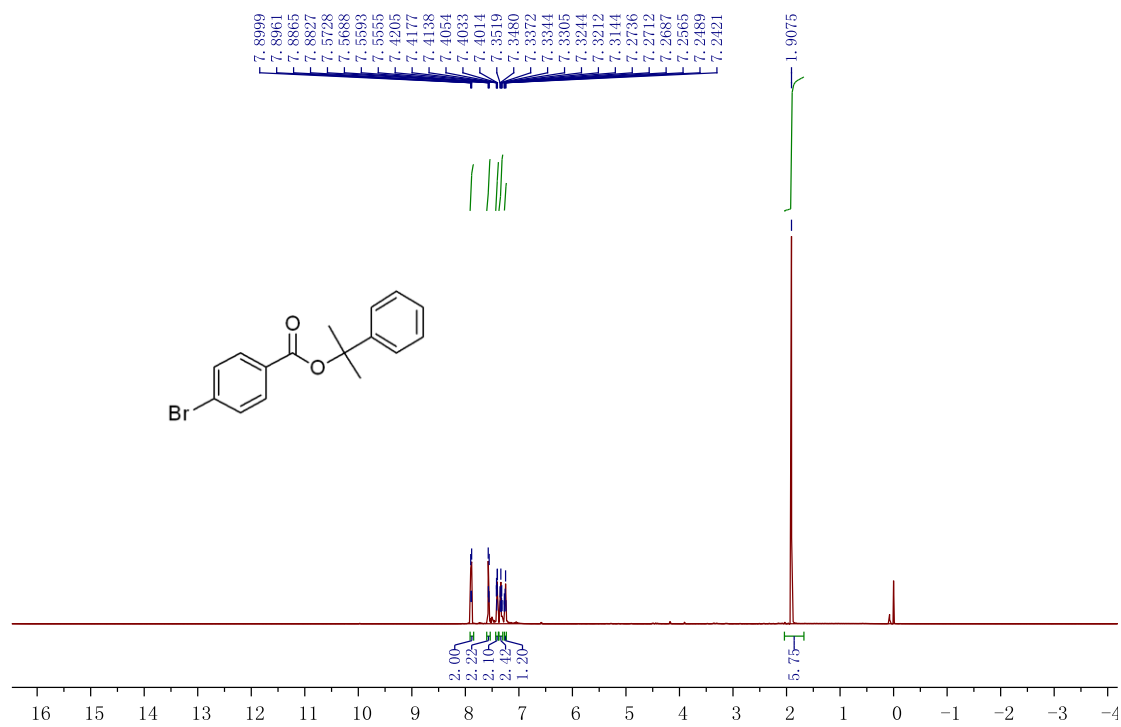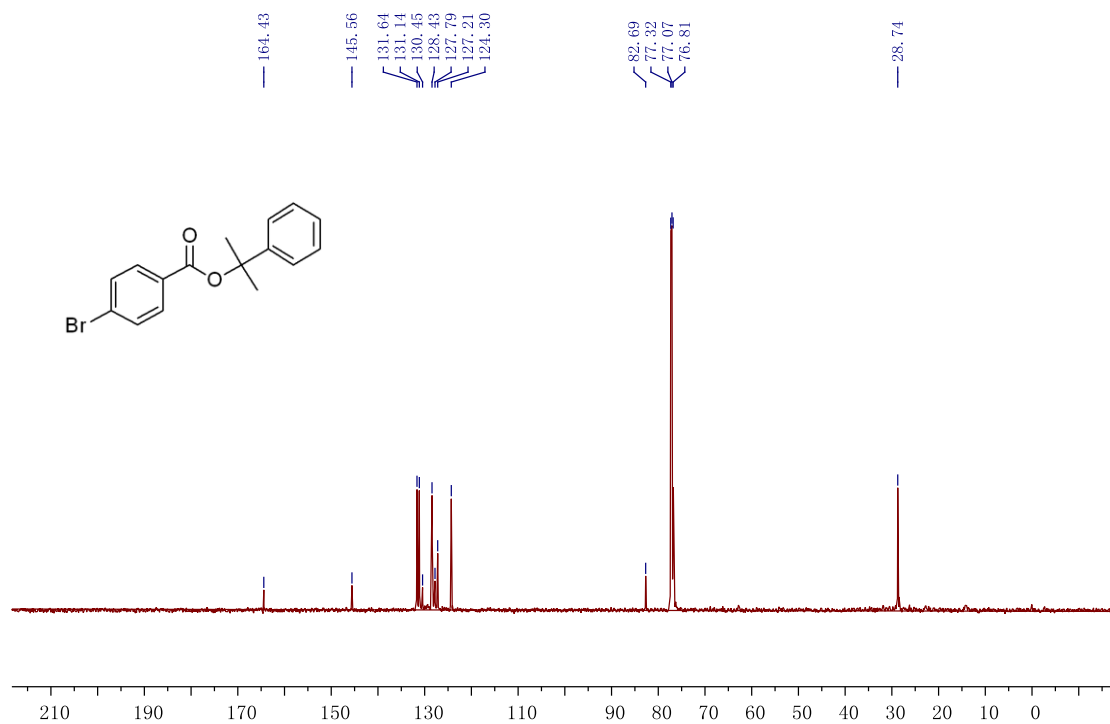

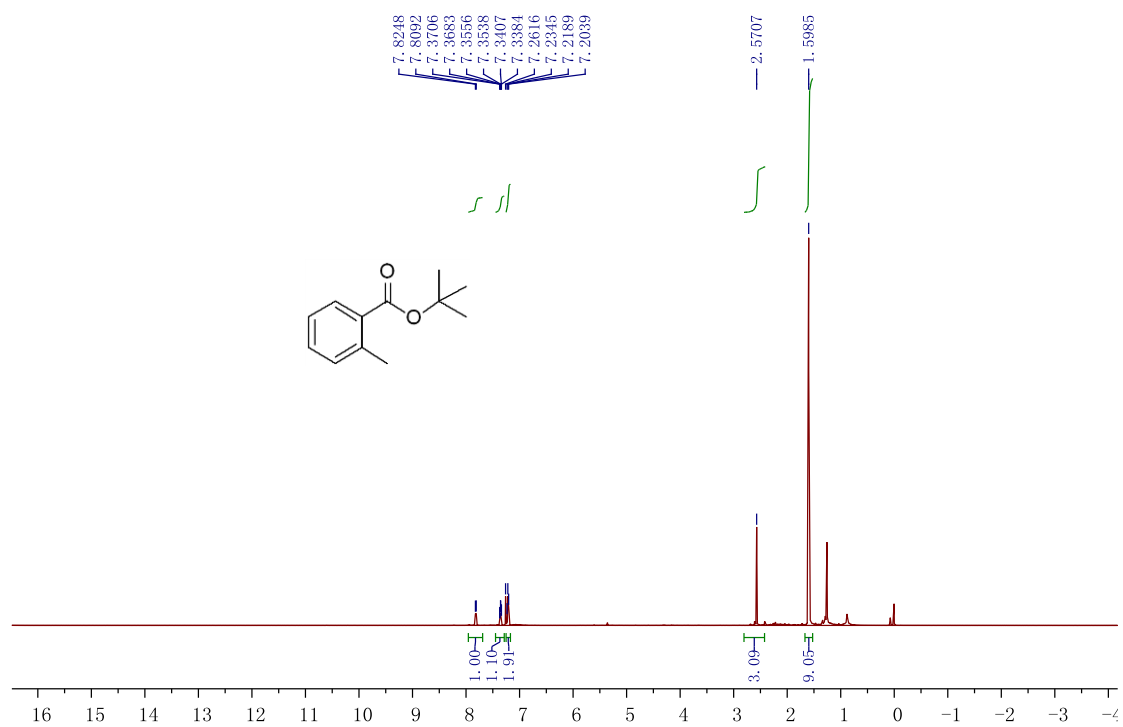

## 6. References

- 1 (a) J. H. Hodgkin, *J. Polym. Sci. Part A: Polym. Chem.* **1986**, *24*, 3117; (b) M. Sasmita, D. Suresh, S. B. Maravanji, T. M. Joel, *Tetrahedron*, **2008**, *64*, 240; (c) K. Kubono, K. Yokoi, *Acta. Crystallogr. C*, **2007**, *63*, 535-537; (d) N. Ikpo, L. N. Saunders, J. L. Walsh, J. M. B. Smith, L. N. Dawe, F. M. Kerton, *Eur. J. Inorg. Chem.* **2011**, *35*, 5347
- 2 P. H. M. Budzelaar, N. N. P. Moonen, R. Gelder, J. M. M. Smits, A. W. Gal, *Eur. J. Inorg. Chem.* **2000**, 753
- 3 Z. Xin, T. M. Gogsig, A. T. Lindhardt, T. Skrydstrup, *Org. Lett.* **2012**, *14*, 284
- 4 Y. Nishimoto, S. A. Babu, M. Yasuda, A. Baba, *J. Org. Chem.* **2008**, *73*, 9465
- 5 E. C. Taylor, G. S. K. Wong, *J. Org. Chem.* **1988**, *53*, 35
